# Supplementary material for: Metabolite Profiling in a Diet-Induced Obesity Mouse Model and Individuals with Diabetes: A Combined Mass Spectrometry and Proton Nuclear Magnetic Resonance Spectroscopy Study
Source: MDPI journal article supplement (doi:10.3390/metabo13070874), 2023-07-23
Supplement: s1 [file s1]

**Table S1.** List of reported metabolites from MS measurements.

In total, 108 Identified and putatively annotated metabolites were measured. A list of reported metabolites can be found below, including corresponding m/z, chromatographic retention time, HMDB identifier and annotation confidence. Annotations with confidence level 1 were confirmed using an in-house metabolite library of synthetic standards.

| Metabolites                               | m/z      | rt    | HMDB ID   | Annotation Level |
|-------------------------------------------|----------|-------|-----------|------------------|
| Alanine                                   | 90.0553  | 7.5   | HMDB00161 | 1                |
| Dimethylglycine                           | 104.0703 | 6.59  | HMDB00092 | 1                |
| Choline                                   | 104.1074 | 4.01  | HMDB00097 | 1                |
| Creatinine                                | 114.0663 | 4.55  | HMDB00562 | 1                |
| Proline                                   | 116.0703 | 6.64  | HMDB00162 | 1                |
| Guanidineacetate                          | 118.0613 | 7.56  | HMDB00128 | 1                |
| Betaine                                   | 118.0864 | 6.14  | HMDB00043 | 1                |
| Threonine                                 | 120.0653 | 7.85  | HMDB00167 | 1                |
| Nicotinamide                              | 123.0553 | 1.36  | HMDB01406 | 1                |
| Taurine                                   | 126.0223 | 6.62  | HMDB00251 | 1                |
| Pyroglutamate                             | 130.0503 | 2.56  | HMDB00267 | 2                |
| <i>N</i> -methylproline                   | 130.0863 | 6.25  | HMDB94696 | 1                |
| Pipecolate                                | 130.0863 | 6.84  | HMDB00716 | 1                |
| Creatine                                  | 132.0773 | 7.19  | HMDB00064 | 1                |
| Isoleucine                                | 132.1023 | 6.09  | HMDB00172 | 1                |
| Leucine                                   | 132.1023 | 5.92  | HMDB00687 | 1                |
| Asparagine                                | 133.0603 | 8.7   | HMDB00168 | 1                |
| Ornithine                                 | 133.0973 | 11.58 | HMDB00214 | 1                |
| Trigonelline                              | 137.0474 | 6.38  | HMDB00875 | 1                |
| Methylnicotinamide                        | 137.0704 | 4.96  | HMDB03152 | 1                |
| Proline.betaine                           | 144.1023 | 6.21  | HMDB04827 | 1                |
| 4-trimethylammoniobutanoate               | 146.1174 | 4.58  | HMDB01161 | 1                |
| Glutamine                                 | 147.0763 | 8.48  | HMDB00641 | 1                |
| Lysine                                    | 147.1133 | 11.4  | HMDB00182 | 1                |
| Glutamate                                 | 148.0603 | 8.14  | HMDB00148 | 1                |
| Methionine                                | 150.0583 | 6.32  | HMDB00696 | 1                |
| <i>N</i> -Methyl-4-pyridone-3-carboxamide | 153.0653 | 1.92  | HMDB04194 | 1                |
| Methyllysine                              | 161.1283 | 10.66 | HMDB02038 | 1                |
| Carnitine                                 | 162.1124 | 6.19  | HMDB00062 | 1                |
| Methionine-S-oxide                        | 166.0533 | 8.23  | HMDB02005 | 1                |
| 7-methylguanine                           | 166.0723 | 4.77  | HMDB00897 | 1                |
| Phenylalanine                             | 166.0863 | 5.88  | HMDB00159 | 1                |
| 3-methylhistidine                         | 170.0923 | 10.82 | HMDB00479 | 1                |
| Acetylornithine                           | 175.1093 | 7.86  | HMDB03357 | 1                |
| Arginine                                  | 175.1193 | 10.92 | HMDB00517 | 1                |
| Citrulline                                | 176.1023 | 9.04  | HMDB00904 | 1                |
| Dimethyllysine                            | 176.1513 | 10.17 | 0         | 1                |

|                          |          |       |             |   |
|--------------------------|----------|-------|-------------|---|
| Cotinine                 | 177.1023 | 1.43  | HMDB0001046 | 1 |
| Tyrosine                 | 182.0813 | 6.64  | HMDB00158   | 1 |
| Homoarginine             | 189.1343 | 10.59 | HMDB00670   | 1 |
| Kynurenate               | 190.0503 | 5.06  | HMDB00715   | 1 |
| Homocitrulline           | 190.1183 | 8.86  | HMDB00679   | 1 |
| DMGV                     | 202.1184 | 6.01  | HMDB0240212 | 1 |
| ADMA                     | 203.1503 | 9.52  | HMDB01539   | 1 |
| Acylcarnitine C2:0       | 204.1234 | 4.45  | HMDB00201   | 1 |
| Tryptophan               | 205.0973 | 5.93  | HMDB00929   | 1 |
| 3-hydroxytrimethyllysine | 205.1544 | 10.8  | HMDB01422   | 1 |
| Kynurenine               | 209.0923 | 6     | HMDB00684   | 1 |
| Acetylarginine           | 217.1293 | 7.08  | HMDB04620   | 1 |
| Acylcarnitine C3:0       | 218.1384 | 4.06  | HMDB00824   | 1 |
| Ergothioneine            | 230.0953 | 7.35  | HMDB03045   | 1 |
| Acylcarnitine C4:0       | 232.1534 | 3.63  | HMDB02013   | 1 |
| Tiglylcarnitine          | 243.1464 | 3.46  | HMDB02366   | 2 |
| Acylcarnitine C5:0       | 245.1624 | 3.23  | HMDB00688   | 1 |
| Glycerophosphocholine    | 259.1173 | 8.71  | HMDB00086   | 2 |
| Acylcarnitine C6:0       | 260.1854 | 2.88  | HMDB00756   | 2 |
| Phenylacetylglutamine    | 265.1173 | 1.98  | HMDB06344   | 1 |
| 1-methyladenosine        | 282.1203 | 6.46  | HMDB03331   | 2 |
| Acylcarnitine C8:0       | 288.2164 | 2.49  | HMDB00791   | 1 |
| Acylcarnitine C10:3      | 310.2014 | 2.42  | 0           | 2 |
| Acylcarnitine C10:2      | 312.2164 | 2.44  | 0           | 2 |
| Acylcarnitine C10:1      | 314.2314 | 2.34  | HMDB13205   | 2 |
| Acylcarnitine C10:0      | 316.2484 | 2.18  | HMDB00651   | 1 |
| Acylcarnitine C12:1      | 342.2624 | 2.16  | HMDB13326   | 2 |
| Acylcarnitine C12:0      | 344.2784 | 2.13  | HMDB02250   | 2 |
| Acylcarnitine C14:1      | 370.2934 | 2.03  | HMDB0240588 | 2 |
| Acylcarnitine C14:0      | 372.3104 | 1.94  | HMDB05066   | 1 |
| Acylcarnitine C16:0      | 400.3424 | 1.85  | HMDB00222   | 1 |
| 25-hydroxyvitamin-D3     | 401.3413 | 0.81  | HMDB03550   | 1 |
| Acylcarnitine C18:2      | 424.3454 | 1.87  | 0           | 2 |
| Acylcarnitine C18:1      | 426.3564 | 1.86  | 0           | 2 |
| Beta-carotene            | 537.4453 | 0.83  | HMDB00561   | 1 |
